# Ecological Network Metrics: Opportunities for Synthesis

Matthew K. Lau<sup>1,\*</sup>, Stuart R. Borrett<sup>2,3</sup>, Benjamin Baiser<sup>4</sup>,  
Nicholas J. Gotelli<sup>5</sup>, Aaron M. Ellison<sup>1</sup>

1. Harvard Forest, Harvard University; 2. Department of Biology and Marine Biology, University of North Carolina Wilmington; 3. Duke Network Analysis Center, Social Science Research Institute, Duke University; 4. Department of Wildlife Ecology and Conservation, University of Florida; 5. Department of Biology, University of Vermont; \*corresponding author: Matthew K. Lau ([matthewklau@fas.harvard.edu](mailto:matthewklau@fas.harvard.edu))

## Abstract

Network ecology provides a systems basis for approaching ecological questions, such as factors that influence biological diversity, the role of particular species or particular traits in structuring ecosystems, and long-term ecological dynamics (e.g. stability). Network theory has enabled ecologists to quantify not just the degree but also the architecture of ecological complexity. Synthesizing recent reviews and developments in the network ecology literature, we identify areas where efforts could have a major impact on the field. We point toward the the need for: integrating network metrics and their terminology across sub-disciplines; benchmarking new network algorithms and models to increase mechanistic understanding; and improving tools for sharing ecological network research, in particular “model” data provenance, to increase the reproducibility of network models and analyses. Given the impact that network theory and methods have had on the field of ecology, advances in these areas area likely to have ramifications across ecology and allied fields.

*Keywords:* Network ecology, systems analysis, computational ecology, metrics, benchmarking, data provenance

## 26 Introduction

27 Interactions are at the heart of ecology and drive many of its key questions. What are  
28 the roles of species interactions in ecological systems? When and why is biological  
29 diversity important? What factors influence the long-term dynamics of ecosystems?  
30 These are all questions with a long history in ecology (Cherrett, 1989; Council, 2003;  
31 Lubchenco et al., 1991; Sutherland et al., 2013). These questions are not addressed  
32 in isolation. Points of intersection include the relationship between diversity and  
33 stability (May, 2001, 2006); the identity and role of species that are the main drivers  
34 of community structure (Paine, 1966, e.g. keystone species), ecosystem engineers  
35 (Jones et al., 1994), or foundation species (Dayton, 1972; Ellison et al., 2005); and  
36 the causes and consequences of introducing new species into existing assemblages  
37 (Baiser et al., 2008; Simberloff and Holle, 1999). Furthermore, 'systems thinking' has  
38 been a persistent thread throughout the history of ecology, dating back at least to  
39 Darwin's *Origin of Species* in his famous pondering of an entangled bank (Bascompte  
40 and Jordano, 2014; Golley, 1993). The application of network theory has provided  
41 a formal, mathematical framework to approach systems (Bascompte and Jordano,  
42 2014; Proulx et al., 2005) and led to the development of network ecology (Borrett  
43 et al., 2014; Poisot et al., 2016b).

44 Network ecology can be defined as the use of network models and analyses to  
45 investigate the structure, function, and evolution of ecological systems at many scales  
46 and levels of organization (Borrett et al., 2012; Eklöf et al., 2012). The influx of  
47 network thinking throughout ecology and ecology's contribution to the development  
48 of network science highlights the assertion that "networks are everywhere" (Lima,  
49 2011). And, as one would expect, the field has grown rapidly, from 1% of the primary  
50 ecological literature in 1991 to over 6% in 2017 (Fig. 1A). Some examples include:  
51 applying network theory to population dynamics and spread of infectious diseases  
52 (May, 2006); description and analysis of networks of proteins in adult organisms  
53 (Stumpf et al., 2007) or during development (Hollenberg, 2007); expanding classical  
54 food webs to include parasites and non-trophic interactions (Ings et al., 2009; Kéfi  
55 et al., 2012); investigating animal movement patterns (Lédée et al., 2016) and the  
56 spatial structure of metapopulations (Dubois et al., 2016; Holstein et al., 2014);  
57 connecting biodiversity to ecosystem functioning (Creamer et al., 2016); identifying  
58 keystone species (Borrett, 2013; Zhao et al., 2016); and using social network theory  
59 in studies of animal behavior (Croft et al., 2004; Fletcher et al., 2013; Krause et al.,  
60 2003; Sih et al., 2009). Further, network ecology concepts and ideas are being applied  
61 to investigate the sustainability of urban and industrial systems (Fang et al., 2014;  
62 Layton et al., 2016; Xia et al., 2016) and elements of the food-energy-water nexus

63 (Wang and Chen, 2016; Yang and Chen, 2016).

64 Over the past 15 years, re-occurring themes for moving network ecology forward  
65 have emerged from reviews and syntheses/perspectives (e.g. Bascompte, 2010; Bor-  
66 rett et al., 2014; Poisot et al., 2015; Proulx et al., 2005). In this paper, we examine  
67 areas where the network approach is being applied to address important ecologi-  
68 cal questions and identify both challenges and opportunities for advancing the field.  
69 Among these are the need for shifting the focus toward mechanism rather than obser-  
70 vation and increasing the resolution (e.g. individuals or traits as nodes and weighted  
71 edges of different interaction types) and replication of network models across different  
72 ecosystems and time (Ings et al., 2009; Poisot et al., 2016*b*; Woodward et al., 2010).  
73 After a brief primer of key network ecology concepts, we discuss the following topics  
74 as they relate to these issues: the proliferation of terminology for ecological metrics  
75 with the increasing application of network methods, fully exploring the underlying  
76 assumptions of models of mechanistic processes for generating network structure and  
77 the need for improved sharing and reproducibility of ecological network research and  
78 models. With respect to each, we discuss recent advances that should be explored  
79 to help address these challenges.

## 80 **A primer of ecological networks: models and met-** 81 **rics**

82 Previous to the introduction of network methods in ecology, the primary way of  
83 studying interactions was limited to detailed studies of behaviors and traits of indi-  
84 vidual species important to interactions or of relationships between tightly interacting  
85 pairs of species (Carmel et al., 2013). However, quantifying interactions is costly, as  
86 compared to surveys of species abundances. This has created a significant barrier to  
87 studying interactions at the scale of entire communities, either at the scale of species  
88 pairs or individuals, as the number of interactions becomes intractable. For instance,  
89 even if one assumes that only pairwise interactions occur among species, the number  
90 of possible pairs is  $S(S - 1)/2$ . Local assemblages of macrobes often have  $10^1 - 10^2$   
91 species, and microbial diversity can easily exceed  $10^3$  OTUs (Operational Taxonomic  
92 Units).

93 This complexity of ecological systems is one reason there is a long tradition in  
94 community ecology of studying interactions within small subsets of closely-related  
95 species (e.g. trophic guilds) and using dimensionality reducing methods based on  
96 multivariate, correlative approaches (Legendre et al., 2012); however, these analysis  
97 do not incorporate the underlying pattern of direct and indirect links among species.

98 Such limitations have led to repeated calls for the application of network thinking to  
99 ecological questions (e.g. Golubski et al., 2016; Ings et al., 2009; Jacoby and Freeman,  
100 2016; Patten and Witkamp, 1967; Proulx et al., 2005; QUINTESENCE Consortium  
101 et al., 2016; Urban and Keitt, 2001). There are now many resources for learning  
102 about network ecology and network theory in general, and we point the reader in the  
103 direction of excellent reviews in this area (Bascompte and Jordano, 2007; Borrett  
104 et al., 2012; Brandes et al., 2013; Ings et al., 2009; Proulx et al., 2005) and more  
105 comprehensive introductions (Brandes et al., 2005; Estrada, 2015; Newman, 2010).

106 Network ecology employs network theory to quantify the structure of ecological  
107 interactions. All networks consist of sets of interacting nodes (e.g. species, non-  
108 living nutrient pools, habitat patches) whose relationships are represented by edges  
109 (e.g. nutrient or energy transfers, pollination, movement of individuals). Conceptu-  
110 ally, a network is a set of things or objects with connections among them. Stated  
111 mathematically, a network is a generic relational-model comprised of a set of objects  
112 represented by nodes or vertices ( $N$ ) and a set of edges ( $E$ ) that map one or more  
113 relationships among the nodes,  $G = (N, E)$ . A prime ecological example is the food  
114 web where the nodes represent species, groups of species, or non-living resources,  
115 and the edges map the relationship *who-eats-whom*.

116 The analysis of networks is inherently hierarchical, ranging from the entire net-  
117 work down to individual nodes and edges. Depending on the characteristics and level  
118 of detail of the information provided for a given model, there is a large number of  
119 network analyses and metrics that can be used to characterize the system at multiple  
120 levels (similar to Hines and Borrett, 2014; Wasserman and Faust, 1994): including,  
121 (1) the whole network level (i.e., the entire network), (2) the sub-network level (i.e.,  
122 groups of two or more nodes and their edges), and (3) the individual node or edge  
123 level (Fig. 2).

124 Network-level metrics integrate information over the entire set of nodes and edges.  
125 For example, the number of nodes (e.g., the species richness in a food web) and  
126 the density of connections or connectance are both network-level statistics used to  
127 describes the overall complexity of a network and have been investigated by ecologists  
128 for over 40 years (Allesina and Tang, 2012; May, 1972). Sub-network level analyses  
129 focus on identifying specific subsets of nodes and edges. There are a variety of  
130 groups that have different names (e.g., module, motif, cluster, clique, environ) and  
131 different methods for measurement. Sub-networks often represent more tractable  
132 and meaningful units of study than individual nodes and edges on the one hand  
133 or entire networks on the other. For example in landscape and population ecology,  
134 the preferential movement of individuals and genes (edges) between habitat patches  
135 (nodes) has implications for conservation of populations and the design of preserves

136 (Calabrese and Fagan, 2004; Fletcher et al., 2013). Also, both nodes and edges  
137 can be divided into classes. An example of this is the bipartite graph, in which  
138 interactions occur primarily between, rather than within, each class or “part” of the  
139 community. A bipartite network has only two classes of nodes, such as the *Daphni*  
140 *phryganic* pollination network (Petanidou et al., 2008) in which the community is  
141 divided into plants being pollinated and insects that do the pollination. In this  
142 network, edges representing pollination visits can only map between two nodes in  
143 the different classes.

144 Metrics at the individual node or edge level quantify differences in its relative  
145 importance. Whether we are interested in an individual or species that transmits  
146 disease, species whose removal will result in secondary extinctions, or key habitat  
147 patches that connect fragmented landscapes, identifying important nodes is a critical  
148 component of network analysis. Another type of node or edge-level metric involves  
149 classifying nodes (edges) according to their roles within a network. This classifica-  
150 tion can use information from differing levels. Additionally, nodes and edges can  
151 have variable characteristics. Edges can be weighted and they can map a directed  
152 relationship (as opposed to a symmetric or undirected relationship). For example,  
153 in ecosystem networks, the edges show the directed movement of energy or nutri-  
154 ents from one node to another by some process like feeding, and the edge weight  
155 can indicate the amount of energy or mass in the transaction (Baird and Ulanowicz,  
156 1989; Dame and Patten, 1981). Nodes can also be weighted (e.g. size of individ-  
157 ual, population size, biomass of a given species). Lastly, network models are flexible  
158 enough to accommodate variation in edge types and relationships among edges (e.g.  
159 hypergraphs), but analysis of these more complicated models is challenging and has  
160 only begun to be applied in ecology (e.g. Golubski et al., 2016).

## 161 **Resolving network metrics**

162 The application of network theory defines an explicit mathematical formalism that  
163 provides a potentially unifying set of terms for ecology and its inter-disciplinary ap-  
164 plications (QUINTESENCE Consortium et al., 2016). Ironically, the development  
165 of ecological network metrics has had an opposing affect. One reason for this is  
166 that introductions have occurred in multiple sub-disciplinary branches (Fig. 1 B)  
167 (Blüthgen, 2010; Borrett et al., 2014; Carmel et al., 2013). Having separate research  
168 trajectories can facilitate rapid development of ideas and the process of integration  
169 can lead to novel insights (Hodges, 2008); however, this innovation has come at the  
170 cost of the “rediscovery” of the same network metrics and subsequent description of  
171 it with a new term. This has lead to different metrics with similar purposes existing

172 in separate areas of ecology (Table 1).

173 Ecological studies using network approaches draw from a deep well of general net-  
174 work theory (Newman, 2003, 2006; Strogatz, 2001). Ecologists broadly use network  
175 concepts, techniques, and tools to (1) characterize the system organization (Borrett,  
176 2013; Croft et al., 2004; Ulanowicz, 1986), (2) investigate the consequences of the  
177 network organization (Borrett et al., 2006; Dunne et al., 2002; Grilli et al., 2016),  
178 and (3) identify the processes or mechanisms that might generate the observed pat-  
179 terns (Allesina and Pascual, 2008; Fath et al., 2007; Guimarães et al., 2007; Poisot  
180 et al., 2016b; Ulanowicz et al., 2014; Williams and Martinez, 2000). However, a great  
181 example of the profusion of network metrics is connectance  $C$ , which is used by food  
182 web ecologists to mean the the ratio of the number of edges in the network divided by  
183 the total number of possible edges. Elsewhere in the network science literature, this  
184 measurement is referred to as network density (Newman et al., 2001). As another  
185 example, what ecosystem ecologists have described as Average Path Length (total  
186 system throughflow divided by the total system input) (Finn, 1976) has also been  
187 called network aggradation (Jørgensen et al., 2000) and in economics its known as  
188 the multiplier effect (Samuelson, 1948).

189 Another kind of redundancy is the creation and use of multiple statistics that  
190 measure the same or very similar network aspects. A clear example of this is inher-  
191 ent in the proliferation of centrality measures to indicate node or edge importance.  
192 Network scientists have shown that many centrality metrics are correlated (Jordán  
193 et al., 2007; Newman, 2006; Valente et al., 2008), leading to studies that provide  
194 dendrograms showing the correlation among selected metrics (Jordán et al., 2007).  
195 Likewise, Borrett and Osidele (2007) found that nine commonly reported ecosystem  
196 network analysis metrics covaried in 90 plausible parameterizations of a phosphorus  
197 biogeochemical cycling model for Lake Lanier, GA, and that this could be largely  
198 associated with two underlying factors. However, even a perfect correlation does not  
199 mean that two metrics have identical properties and may diverge in values with the  
200 exploration of additional models. Therefore, it's important to have mathematically  
201 based comparisons of metrics (Borgatti and Everett, 2006; Borrett, 2013; Kazanci  
202 and Ma, 2015) and a significant challenge for network ecologists is to establish the  
203 independence and uniqueness of the descriptive metrics used.

204 From the perspective of the broader field of ecology, the proliferation of concepts,  
205 terms and metrics is not an new issue (e.g. Ellison et al., 2005; Tansley, 1935). Ecolo-  
206 gists have a long history of using network concepts and related models in multiple sub-  
207 domains (e.g, metapopulations, matrix population models, community co-occurrence  
208 models, ecosystems) without fully recognizing or capitalizing on the similarities of  
209 the underlying models. Each subdomain has thus constructed their own concepts

210 and methods (occasionally borrowing from other areas), building their own jargon  
211 that impedes scientific development. Previous suggestions to solving this issue have  
212 focused on maintaining an historical perspective of ecology (Graham and Dayton,  
213 2002). Additionally Blüthgen et al. (2008) is an excellent example of how this can  
214 be done through peer reviewed literature.

## 215 **Benchmarking: Trusting our models of mechanisms**

216 Inferences about processes in ecological systems have relied in part on the application  
217 of simulation models that generate matrices with predictable properties. As discussed  
218 in the previous section the proliferation of network metrics points to the need for  
219 the investigation and comparison of how these metrics will behave in the context  
220 of different modeling algorithms. Once a metric or algorithm has been chosen, it  
221 is tempting to begin applying them to empirical systems to detect patterns, but  
222 before research proceeds, a process of “benchmarking” with artificial matrices that  
223 have controlled, known amounts of structure and randomness should be used to  
224 examine the behavior of the algorithms and the metrics that are applied to them.  
225 For example, like the Hardy-Weinberg equilibrium in population genetics, ecological  
226 null models have been used to measure deviations caused by important biological  
227 forces beyond simple effects of sampling and stochasticity in ecological communities.  
228 Also, on a similar trajectory, developments in network theory have pointed toward  
229 a similar need for testing the properties of models that generate networks (Maslov  
230 and Sneppen, 2002). However, the devil is in the details, and there is a variety of  
231 ways to randomize data and impose constraints in order to construct a useful null  
232 model (see Box 1).

233 Recently, benchmarking ecological models has developed from community ecol-  
234 ogy’s null model analysis (Atmar and Patterson, 1993; Connor and Simberloff, 1979;  
235 Gotelli and Ulrich, 2012). Null models are specific examples of randomization or  
236 Monte Carlo tests (Manly, 2007), which estimate a frequentist  $p$ -value, the tail prob-  
237 ability of obtaining the value of some metric if the null hypothesis were true (Gotelli  
238 and Graves, 1996). The aim is to determine if the structure of some ecological pat-  
239 tern in space or time is incongruous with what would be expected given the absence  
240 of a causal mechanism. In this process, a metric of structure calculated for a single  
241 empirical data set is compared to the distribution of the same metric calculated for  
242 a collection of randomizations of the empirical data set. The data are typically ran-  
243 domized by reshuffling some elements while holding other constant to incorporate  
244 realistic constraints.

245 Similar to the null modeling approach, in network theory, the Erdos-Renyi (ER,

246 (Erdős and Rényi, 1959)) network model is a now classic examples of a network model  
247 used to generate networks via a random process for creating matrix structure. The  
248 ER model is a random graph that starts with an  $N \times N$  adjacency matrix of nodes  
249 and assigns to it  $K$  edges between randomly chosen pairs of nodes, and has seen direct  
250 application in ecology to address questions on the relationship between stability and  
251 complexity (May, 1972) and the structure of genetic networks (Kauffman et al.,  
252 2003). For example, randomized networks have been used to link motifs (Milo et al.,  
253 2002) to network assembly (Baiser et al., 2016), stability (Allesina and Pascual, 2008;  
254 Borrelli et al., 2015) and persistence in food webs (Stouffer and Bascompte, 2010).

255 In addition to the random matrix approaches of null and ER models, there are  
256 other, more complex algorithms that are used to generate structured matrices. Per-  
257 haps one of the best known in network theory is the Barabasi-Albert (BA, Barabási  
258 and Albert 1999) model, which adds nodes and edges to a growing network with a  
259 greater probability of adding edges to nodes with a higher degree. The BA algorithm  
260 is similar to ecological network algorithms that generate non-random structure, either  
261 because of direct influence or from similar processes operating in systems of inter-  
262 est. Some of these models include processes of “preferential attachment” in which  
263 organisms tend to interact with the same, common species. Food-web modeling al-  
264 gorithms have also been developed that use a trait-based approach (e.g. Allesina and  
265 Pascual, 2009), consumer-resource model (Yodzis and Innes, 1992), niche (Williams  
266 and Martinez, 2000), cyber ecosystem algorithms (Fath, 2004), and cascade models  
267 (Allesina and Pascual, 2009; Allesina and Tang, 2012; Cohen and Luczak, 1992).

268 The statistical behavior of some models and metrics can be understood analyt-  
269 ically. For example, the network generated via the BA algorithm display degree  
270 distributions with approximate power-law distribution, which conforms more closely  
271 to many real-world “scale-free” networks (Albert et al., 2002). Under the condition  
272 that the network is sparse (i.e. ( $K \ll N^2$ )), the degree distribution of the network  
273 should follow a Poisson distribution. However, as new models and metrics are intro-  
274 duced, new benchmarking should be done and compared to previous results. New-  
275 man et al. (2016) is one such example of how benchmarking has recently been used  
276 for investigating processes operating on ecological networks. Ludovisi and Scharler  
277 (2017) advocate the same approach for the analysis of network models in general. For  
278 users of the R programming language, the **benchmark** package is a general algorithm  
279 testing software package that should provide a useful starting point.



## 280 **Reproducibility: Open-data, Open-source and Prove-** 281 **nance**

282 As analysis of network models increases in computational intensity, there is a result-  
283 ing increase in the need for new tools to track and share key computational details.  
284 The need is compounded when models incorporate data from multiple sources or  
285 analyses involve random processes. The combination of the volume of data and  
286 compute intensity of ecological network studies, benchmarking itself being a prime  
287 example, is increasing the burden on ecologists to provide information adequate for  
288 the reproduction of datasets, analyses and results. As the sharing and reproducibil-  
289 ity of scientific studies are both essential for advances to have lasting impact, finding  
290 easier, faster and generally more convenient ways to record and report relevant in-  
291 formation for ecological network studies is imperative for advancing the field.

292 Sharing data and open-source code has become a broad practice in ecology, and  
293 network ecologists are now producing more network models and data (e.g. Fig. 1  
294 A). This includes not only ecological interaction networks, but also an influx of  
295 other relevant networks, like ecological genomic networks being generated by next-  
296 generation, high-throughput sequencing technology (Langfelder and Horvath, 2008;  
297 Zinkgraf et al., 2017). Exemplifying this increase in data sharing in general and net-  
298 work models in specific, there are now multiple web-accessible scientific databases  
299 (e.g. NCBI, Data Dryad, Dataverse, etc.) and at least four databases have been  
300 constructed specifically to curate ecological network data: including “Kelpforest”  
301 (Beas-Luna et al., 2014), “The Web of Life” (Fortuna et al., 2014), “Mangal” eco-  
302 logical network database (Poisot et al., 2015) and the “Interaction Web Database”  
303 <https://www.nceas.ucsb.edu/interactionweb/resources.html>.

304 This increase in ecological network data is linked to an increasing rate of shared  
305 analytical code and other open-source software. It is now commonplace for ecologists  
306 to have a working knowledge of at least one programming language if not several,  
307 such as R, Python, SAS, MatLab, Mathematica, SPSS, etc. Multiple software pack-  
308 ages exist for conducting ecological analysis, including ecological network analyses.  
309 In addition to the general network analysis packages available in R, there are also  
310 at least two packages aimed specifically at ecological network analysis: *bipartite*  
311 and *enaR*. *enaR* (Borrett and Lau, 2014; Lau et al., 2015) provides a suite of algo-  
312 rithms developed in the ecosystem network analysis (ENA) literature; while *bipartite*  
313 (Dormann et al., 2009) provides functions drawn largely from community ecology.

314 Although, ecology has long had a culture of keeping records of important re-  
315 search details, such as field and lab notebooks, these practices put all of the burden  
316 of recording “meta-data” on the researcher. Manual record keeping methods, even

317 when conforming to meta-data standards (Boose et al., 2007, e.g. EML, see), do not  
318 take advantage of the power of the computational environment. Data-provenance  
319 methods aims is to provide a means to collect formalized information about com-  
320 putational processes, ideally in a way that aids the reproducibility of studies with  
321 minimal impact on the day-to-day activities of researchers (Boose et al., 2007). These  
322 techniques have been applied in other areas of research and could provide an effective  
323 means for documenting the source and processing of data from the raw state into a  
324 model (Boose et al., 2007).

325 The reproducibility of scientific studies is imperative for advances to have lasting  
326 impact through the independent verification of results. Although this has been an  
327 ongoing topic of discussion in ecology (Ellison, 2010; Parker et al., 2016), the need  
328 was highlighted by a recent survey finding issues with reproduction of studies across  
329 many scientific disciplines (Baker, 2016). Clearly, it is also important in network  
330 ecology for data sources and methods for model construction be standardized and  
331 transparent and that models be curated and shared (McNutt et al., 2016). Collecting  
332 details, such as those enabled by data provenance capture software, is one innovative  
333 way forward.

334 These tools have been developing in the computer science domain for decades;  
335 however, they have only recently begun to gain a foot-hold in ecology (Boose et al.,  
336 2007; Ellison, 2010) and even more recently have begun to expand to the broader  
337 scientific community. Although there are many challenges for the development and  
338 application of data provenance principles in general, multiple software packages do  
339 exist for collecting data provenance in the context of scientific investigations. Two  
340 provenance capture packages exist in R, the `recordr` package associated with the  
341 DataOne repository (Cao et al., 2016) and `RDataTracker` (Lerner and Boose, 2014).  
342 In addition, although it does not collect formal data provenance, there are also  
343 methods developed for “literate computing” that help to collect code along with  
344 details about the code and the intention of the analyses. The Jupyter notebook  
345 project is a great example of this approach (Shen and Barabasi, 2014).

346 Specific to ecological networks, although it does not conduct data provenance  
347 capture, there is a precedence of software implemented to collect “data pedigree”  
348 in the context of food-web models. Data pedigree was initially implemented in the  
349 EcoPath food web modeling software (Guesnet et al., 2015; Heymans et al., 2016) pri-  
350 marily focuses on defining confidence intervals and precision estimates for network  
351 edges and has been developed to enable the use of informative priors in Bayesian  
352 modeling of ecological networks. This is done by linking models to associated liter-  
353 ature that estimates were derived from, which is similar to meta-data information  
354 incorporated into ecological network databases. Although this approach focuses on

355 a subcomponent of an ecological network model’s provenance, this is a promising  
356 way to address the issue that networks, network metrics and simulation models used  
357 to analyze them commonly assume there is no uncertainty, although see sensitivity  
358 and uncertainty analyses of network metrics (Borrett and Osidele, 2007; Kauffman  
359 et al., 2003; Kones et al., 2009), and typically ignore inaccuracy in the empirical data  
360 (Ascough et al., 2008; Gregr and Chan, 2014).

## 361 **Moving Forward**

362 This is a part of a broad integration across many scientific disciplines that is aimed  
363 at consilience of theory. The synthesis of ecological concepts through the mathe-  
364 matically rigorous “lingua franca” of network terminology holds potential to unite  
365 theory across ecological sub-disciplines. As with previous concepts (e.g. keystone,  
366 foundation species, ecosystem engineer, etc.), greater clarity and less redundancy  
367 should come about as these terms are used more commonly and researchers com-  
368 pare the mathematical and computational underpinnings of the metrics that they  
369 are using. With the increased use of these approaches, the network concept has and  
370 will continue to serve as a common model that transcends disciplines and has the  
371 potential to serve as an in-road for new approaches.

372 The burgeoning of “open” culture in the sciences (Hampton et al., 2014), holds  
373 potential to serve as a resource for models and a clearing-house for resolving the  
374 validity of models, algorithms and metrics. First, because code is openly shared  
375 functions used to calculate metrics is open for inspection and, if coded and docu-  
376 mented clearly using software best practices (e.g. Noble, 2009; Visser et al., 2015),  
377 provides a transparent documentation of a metrics implementation and its computa-  
378 tional similarity to other metrics. Second, enabled by the ability to write their own  
379 functions and code researchers can (in addition to analyzing other metrics mathe-  
380 matically) conduct numerical investigation of metric similarity. Through comparison  
381 of metrics calculated on the same or similar network models, a researcher could at  
382 least argue for a given model set that two or more metrics produce similar results  
383 and, therefore, could have similar calculations. Last, data provenance provides a  
384 useful tool to aide in the dissemination and synthesis of network models and increase  
385 the reproducibility of ecological network studies, including those documenting new  
386 metrics and benchmarking those metrics and associated algorithms for generating or  
387 analyzing empirical models.

388 The influx of network theory into ecology has lead to a proliferation of metrics.  
389 Development and application of new technology (e.g. sequencing methods and com-  
390 putational, data-driven approaches) has the potential to increase both the abundance

391 and quality of ecological networks. Over half a century ago, Robert MacArthur pub-  
392 lished his first paper on the relationship between diversity and stability, initiating  
393 multiple research trajectories that have now become the mainstay of many ecologi-  
394 cal research programs (MacArthur, 1955). In his paper, the theory that MacArthur  
395 used was based on flows of energy through networks of interacting species. Thus,  
396 network theory is at the roots of ecological metrics, which is arguably one of the most  
397 widely studied topics in ecology. With thoughtful dialogue across sub-disciplines and  
398 among research groups, further infusion of network theory and methods will continue  
399 to benefit ecology into the future.

400 Projecting into the future of network ecology, there is a pressing challenge of not  
401 only sharing, but integrating and using the large amounts of information enabled  
402 by technological advances. For example, synthetic networks (Poisot et al., 2016a,  
403 i.e. networks merging models from different studies *sensu*) are a promising new  
404 venture for the future of network ecology, but their structural properties and the  
405 behavior of network metrics will require careful investigation, including the applica-  
406 tion of systematic benchmarking. Mutliti-trophic networks provide a precedence for  
407 these studies to move forward, but synthesizing models from across many different  
408 sources produces new challenges for developing and benchmarking metrics, as well  
409 as an opportunity for new technology, like data provenance, to help establish better  
410 connections among studies and researchers.

## 411 References

- 412 Albert, R., A. L. Barabasi, and A.-L. Barabási. 2002. Statistical mechan-  
413 ics of complex networks. *Reviews of Modern Physics* **74**:47–97. URL <http://journals.aps.org/rmp/abstract/10.1103/RevModPhys.74.47>  
414 <http://dx.doi.org/10.1103/RevModPhys.74.47>  
415 <http://arxiv.org/abs/10.1103/RevModPhys.74.47>  
416 <http://publication/doi/10.1103/RevModPhys.74.47>.
- 417 Allesina, S., and M. Pascual. 2008. Network structure, predatorprey modules, and  
418 stability in large food webs. *Theoretical Ecology* **1**:55–64. URL [http://www.  
419 springerlink.com/index/10.1007/s12080-007-0007-8](http://www.springerlink.com/index/10.1007/s12080-007-0007-8).
- 420 Allesina, S., and M. Pascual. 2009. Food web models: A plea for groups. *Ecology*  
421 *Letters* **12**:652–662.
- 422 Allesina, S., and S. Tang. 2012. Stability criteria for complex ecosystems. *Nature*  
423 **483**:205–8. URL <http://dx.doi.org/10.1038/nature10832>.

- 424 Ascough, J., H. Maier, J. Ravalico, and M. Strudley. 2008. Future research chal-  
425 lenges for incorporation of uncertainty in environmental and ecological decision-  
426 making. *Ecological Modelling* **219**:383–399. URL <http://www.sciencedirect.com/science/article/pii/S0304380008003554>.  
427
- 428 Atmar, W., and B. D. Patterson. 1993. The measure of order and disorder in  
429 the distribution of species in fragmented habitat. *Oecologia* **96**:373–382. URL  
430 <http://link.springer.com/10.1007/BF00317508>.
- 431 Baird, D., and R. E. Ulanowicz. 1989. The seasonal dynamics of the Chesapeake  
432 Bay ecosystem. *Ecological Monographs* **59**:329–364.
- 433 Baiser, B., R. Elhessa, and T. Kahveci. 2016. Motifs in the assembly of food web  
434 networks. *Oikos* **125**:480–491. URL <http://dx.doi.org/10.1111/oik.02532>.
- 435 Baiser, B., J. L. Lockwood, D. La Puma, and M. F. J. Aronson. 2008. A per-  
436 fect storm: two ecosystem engineers interact to degrade deciduous forests of New  
437 Jersey. *Biological Invasions* **10**:785–795. URL <http://link.springer.com/10.1007/s10530-008-9247-9>.  
438
- 439 Baker, M. 2016. 1,500 scientists lift the lid on reproducibility. *Nature* **533**:452–454.  
440 URL <http://www.nature.com/doi/10.1038/533452a>.
- 441 Barabási, A.-L., and R. Albert. 1999. Emergence of scaling in random networks.  
442 *Science* **286**:509–512.
- 443 Barabási, A.-L., R. Albert, and H. Jeong. 2000. Scale-free characteristics of random  
444 networks: the topology of the world-wide web. *Physica A: statistical mechanics  
445 and its applications* **281**:69–77.
- 446 Bascompte, J. 2010. Ecology. Structure and dynamics of ecological networks. *Science*  
447 (New York, N.Y.) **329**:765–6. URL [http://www.sciencemag.org/content/329/  
448 5993/765.short](http://www.sciencemag.org/content/329/5993/765.short).
- 449 Bascompte, J., and P. Jordano. 2007. Plant-Animal Mutualistic Networks: The Ar-  
450 chitecture of Biodiversity. *Annual Review of Ecology, Evolution, and Systematics*  
451 **38**:567–593.
- 452 Bascompte, J., and P. Jordano. 2014. Mutualistic networks. Princeton University  
453 Press.

- 454 Beas-Luna, R., M. Novak, M. H. Carr, M. T. Tinker, A. Black, J. E. Caselle,  
455 M. Hoban, D. Malone, and A. Iles. 2014. An online database for informing  
456 ecological network models: <http://kelpforest.ucsc.edu>. *PloS one* **9**:e109356. URL  
457 <http://dx.plos.org/10.1371/journal.pone.0109356>.
- 458 Blüthgen, N. 2010. Why network analysis is often disconnected from community ecol-  
459 ogy: A critique and an ecologist's guide. *Basic and Applied Ecology* **11**:185–195.  
460 URL <http://linkinghub.elsevier.com/retrieve/pii/S1439179110000125>.
- 461 Blüthgen, N., J. Fründ, D. P. Vázquez, and F. Menzel. 2008. WHAT DO INTERAC-  
462 TION NETWORK METRICS TELL US ABOUT SPECIALIZATION AND BI-  
463 OLOGICAL TRAITS. *Ecology* **89**:3387–3399. URL <http://www.esajournals.org/doi/abs/10.1890/07-2121.1>.
- 465 Bonacich, P., 1987. Power and Centrality: A Family of Measures.
- 466 Boose, E. R., A. M. Ellison, L. J. Osterweil, L. a. Clarke, R. Podorozhny, J. L. Hadley,  
467 A. Wise, and D. R. Foster. 2007. Ensuring reliable datasets for environmental  
468 models and forecasts. *Ecological Informatics* **2**:237–247.
- 469 Borgatti, S. P., and M. G. Everett. 2006. A Graph-theoretic perspective on centrality.  
470 *Social Networks* **28**:466–484. URL [http://www.sciencedirect.com/science/](http://www.sciencedirect.com/science/article/pii/S0378873305000833)  
471 [article/pii/S0378873305000833](http://www.sciencedirect.com/science/article/pii/S0378873305000833).
- 472 Borrelli, J. J., S. Allesina, P. Amarasekare, R. Arditi, I. Chase, J. Damuth, R. D.  
473 Holt, D. O. Logofet, M. Novak, R. P. Rohr, A. G. Rossberg, M. Spencer, J. K.  
474 Tran, and L. R. Ginzburg. 2015. Selection on stability across ecological scales.  
475 *Trends in Ecology & Evolution* **30**:417–425.
- 476 Borrett, S. R. 2013. Throughflow centrality is a global indicator of the functional  
477 importance of species in ecosystems. *Ecological Indicators* **32**:182–196. URL <http://dx.doi.org/10.1016/j.ecolind.2013.03.014>.
- 479 Borrett, S. R., W. Bridewell, P. Langely, and K. R. Arrigo. 2006. A method for  
480 representing and developing process models. *Ecological Complexity* **4**:28. URL  
481 <http://arxiv.org/abs/q-bio/0605025>.
- 482 Borrett, S. R., R. R. Christian, and R. E. Ulanowicz, 2012. Network Ecol-  
483 ogy (Revised). Pages 1767–1772 in A. El-Shaarawi and W. Piegorsch, editors.  
484 *Encyclopedia of Environmetrics* (2nd edition). John Wiley and Sons, Chinch-  
485 ester, second edition. URL [http://people.uncw.edu/borretts/documents/](http://people.uncw.edu/borretts/documents/BorrettChristianUlanowicz2012NetworkEcology.pdf)  
486 [BorrettChristianUlanowicz2012NetworkEcology.pdf](http://people.uncw.edu/borretts/documents/BorrettChristianUlanowicz2012NetworkEcology.pdf).

- 487 Borrett, S. R., B. D. Fath, and B. C. Patten. 2007. Functional integration of  
488 ecological networks through pathway proliferation. *J. Theor. Biol.* **245**:98–111.
- 489 Borrett, S. R., and M. K. Lau. 2014. {enaR}: An {R} package for Ecosystem  
490 Network Analysis. *Methods in Ecology and Evolution* **11**:1206–1213.
- 491 Borrett, S. R., J. Moody, and A. Edelman. 2014. The rise of Network Ecology: Maps  
492 of the topic diversity and scientific collaboration. *Ecological Modelling* page 18.  
493 URL <http://arxiv.org/abs/1311.1785>.
- 494 Borrett, S. R., and O. O. Osidele. 2007. Environ indicator sensitivity to flux un-  
495 certainty in a phosphorus model of Lake Sidney Lanier, USA. *Ecological Mod-*  
496 *elling* **200**:371–383. URL [http://www.sciencedirect.com/science/article/  
497 B6VBS-4M57HDN-2/2/eeeeed79df4b4a4d4787c2ce6f3089af6](http://www.sciencedirect.com/science/article/B6VBS-4M57HDN-2/2/eeeeed79df4b4a4d4787c2ce6f3089af6).
- 498 Borrvall, C., B. Ebenman, and T. Jonsson, 2000. Biodiversity lessens the risk of  
499 cascading extinction in model food webs.
- 500 Brandes, U., T. Erlebach, and Gesellschaft fur Informatik. 2005. Network analysis :  
501 methodological foundations. Springer.
- 502 Brandes, U., G. Robins, A. McCranie, and S. Wasserman. 2013. What is network  
503 science? *Network Science* **1**:1–15.
- 504 Calabrese, J. M., and W. F. Fagan. 2004. A comparison-shopper’s guide to connec-  
505 tivity metrics. *Frontiers in Ecology and the Environment* **2**:529–536. URL [http://doi.wiley.com/10.1890/1540-9295\(2004\)002\[0529:ACGTCM\]2.0.CO;2](http://doi.wiley.com/10.1890/1540-9295(2004)002[0529:ACGTCM]2.0.CO;2).
- 507 Cao, Y., C. Jones, V. Cuevas-Vicenttín, M. B. Jones, B. Ludäscher, T. McPhillips,  
508 P. Missier, C. Schwalm, P. Slaughter, D. Vieglais, L. Walker, and Y. Wei,  
509 2016. DataONE: A Data Federation with Provenance Support. Pages 230–234  
510 . Springer International Publishing. URL [http://link.springer.com/10.1007/  
511 978-3-319-40593-3{\\\_}28](http://link.springer.com/10.1007/978-3-319-40593-3{\_}28).
- 512 Carmel, Y., R. Kent, A. Bar-Massada, L. Blank, J. Liberzon, O. Nezer, G. Sapir, and  
513 R. Federman. 2013. Trends in ecological research during the last three decades—a  
514 systematic review. *PloS one* **8**:e59813.
- 515 Cherrett, J. M., 1989. Key concepts: The results of a survey of our members’  
516 opinions. Pages 1–16 *in* J. M. Cherrett, A. D. Bradshaw, F. B. Goldsmith, P. G.  
517 Grubb, and J. R. Krebs, editors. *Ecological concepts: The contribution of ecology*

- 518 to an understanding of the natural world. Blackwell Scientific Publications, Oxford,  
519 UK.
- 520 Cohen, J. E., and T. Luczak. 1992. Trophic levels in community food webs.  
521 *Evolutionary Ecology* **6**:73–89. URL [http://link.springer.com/10.1007/  
522 BF02285335](http://link.springer.com/10.1007/BF02285335).
- 523 Colwell, R. K., and D. W. Winkler. 1984. A null model for null models in biogeog-  
524 raphy. Princeton University Press.
- 525 Connor, E. F., and D. Simberloff. 1979. The Assembly of Species Communi-  
526 ties: Chance or Competition? *Ecology* **60**:1132. URL [http://www.jstor.org/  
527 stable/1936961?origin=crossref&GotoISI://A1979JS62200008](http://www.jstor.org/stable/1936961?origin=crossref&GotoISI://A1979JS62200008).
- 528 Council, N. R. 2003. Neon. National Academies Press, Washington, D.C. URL  
529 <http://www.nap.edu/catalog/10807>.
- 530 Creamer, R., S. Hannula, J. Van Leeuwen, D. Stone, M. Rutgers, R. Schmelz,  
531 P. De Ruiter, N. B. Hendriksen, T. Bolger, M.-L. Bouffaud, et al. 2016. Eco-  
532 logical network analysis reveals the inter-connection between soil biodiversity and  
533 ecosystem function as affected by land use across Europe. *Applied Soil Ecology*  
534 **97**:112–124.
- 535 Croft, D. P., J. Krause, and R. James. 2004. Social networks in the guppy  
536 (*Poecilia reticulata*). *Proc. Royal Soc. Lond. B.* **271**:S516–S519.
- 537 Dame, R. F., and B. C. Patten. 1981. Analysis of energy flows in an intertidal oyster  
538 reef. *Marine Ecology Progress Series* **5**:115–124. URL [http://www.int-res.com/  
539 articles/meps/5/m005p115.pdf](http://www.int-res.com/articles/meps/5/m005p115.pdf).
- 540 Dayton, P. K. 1972. Toward an understanding of community resilience and the  
541 potential effects of enrichment to the benthos at McMurdo Sound, Antarctica.  
542 *Proceedings of the Colloquium on Conservation Problems in Antarctica* pages 81–  
543 96. URL <http://daytonlab.ucsd.edu/Publications/Pubs.htm>.
- 544 Dormann, C. F., C. F. Dormann, J. Fründ, N. Blüthgen, and B. Gruber. 2009.  
545 Indices, Graphs and Null Models: Analyzing Bipartite Ecological Networks.  
546 *Open Ecology Journal* **2**:7–24. URL [http://citeseerx.ist.psu.edu/viewdoc/  
547 summary?doi=10.1.1.323.9930](http://citeseerx.ist.psu.edu/viewdoc/summary?doi=10.1.1.323.9930).



- 548 Dubois, M., V. Rossi, E. Ser-Giacomi, S. Arnaud-Haond, C. López, and  
549 E. Hernández-García. 2016. Linking basin-scale connectivity, oceanography and  
550 population dynamics for the conservation and management of marine ecosystems.  
551 *Global Ecology and Biogeography* .
- 552 Dunne, J. a., R. J. Williams, and N. D. Martinez. 2002. Network structure and  
553 biodiversity loss in food webs: Robustness increases with connectance. *Ecology*  
554 *Letters* **5**:558–567.
- 555 Eklöf, A., and B. Ebenman. 2006. Species loss and secondary extinctions in simple  
556 and complex model communities. *Journal of Animal Ecology* **75**:239–246.
- 557 Eklöf, A., M. R. Helmus, M. Moore, and S. Allesina. 2012. Relevance of evolutionary  
558 history for food web structure. *Proceedings. Biological sciences / The Royal So-*  
559 *cietty* **279**:1588–96. URL [http://rspb.royalsocietypublishing.org/content/](http://rspb.royalsocietypublishing.org/content/early/2011/11/10/rspb.2011.2149.full)  
560 [early/2011/11/10/rspb.2011.2149.full](http://rspb.royalsocietypublishing.org/content/early/2011/11/10/rspb.2011.2149.full).
- 561 Ellison, A. M. 2010. Repeatability and transparency in ecological research. *Ecology*  
562 **91**:2536–2539.
- 563 Ellison, A. M., M. S. Bank, B. D. Clinton, E. A. Colburn, K. Elliott, C. R. Ford, D. R.  
564 Foster, B. D. Kloeppel, J. D. Knoepp, G. M. Lovett, J. Mohan, D. A. Orwig, N. L.  
565 Rodenhouse, W. V. Sobczak, K. A. Stinson, J. K. Stone, C. M. Swan, J. Thompson,  
566 B. Von Holle, and J. R. Webster. 2005. Loss of foundation species: consequences  
567 for the structure and dynamics of forested ecosystems. *Frontiers in Ecology and*  
568 *the Environment* **3**:479–486. URL [http://www.esajournals.org/doi/abs/10.](http://www.esajournals.org/doi/abs/10.1890/1540-9295(2005)003[0479:LOFSCF]2.0.CO;2?journalCode=fron)  
569 [1890/1540-9295\(2005\)003\[0479:LOFSCF\]2.0.CO;2?journalCode=fron](http://www.esajournals.org/doi/abs/10.1890/1540-9295(2005)003[0479:LOFSCF]2.0.CO;2?journalCode=fron).
- 570 Erdős, P., and a. Rényi. 1959. On random graphs. *Publicationes Mathematicae*  
571 **6**:290–297.
- 572 Estrada, E., 2015. *Introduction to Complex Networks: Structure and Dynamics*.  
573 Pages 93–131 . Springer International Publishing. URL [http://link.springer.](http://link.springer.com/10.1007/978-3-319-11322-7{\_}3)  
574 [com/10.1007/978-3-319-11322-7{\\\_}3](http://link.springer.com/10.1007/978-3-319-11322-7{\_}3).
- 575 Fang, D., B. D. Fath, B. Chen, and U. M. Scharler. 2014. Network environ  
576 analysis for socio-economic water system. *Ecological Indicators* URL [http:](http://www.sciencedirect.com/science/article/pii/S1470160X14001976)  
577 [//www.sciencedirect.com/science/article/pii/S1470160X14001976](http://www.sciencedirect.com/science/article/pii/S1470160X14001976).
- 578 Fath, B. D. 2004. Network analysis applied to large-scale cyber-ecosystems. *Ecolog-*  
579 *ical Modeling* **171**:329–337.

- 580 Fath, B. D., U. M. Scharler, R. E. Ulanowicz, and B. Hannon. 2007. Ecological  
581 network analysis: network construction. *Ecological Modelling* **208**:49–55. URL  
582 <http://www.sciencedirect.com/science/article/pii/S0304380007002517>.
- 583 Finn, J. T. 1976. Measures of ecosystem structure and function derived from analysis  
584 of flows. *Journal of theoretical biology* **56**:363–380.
- 585 Finn, J. T. 1980. Flow analysis of models of the Hubbard Brook ecosystem. *Ecology*  
586 **61**:562–571.
- 587 Fletcher, R. J., A. Revell, B. E. Reichert, W. M. Kitchens, J. D. Dixon, and J. D.  
588 Austin. 2013. Network modularity reveals critical scales for connectivity in ecol-  
589 ogy and evolution. *Nature Communications* **4**. URL [http://www.nature.com/](http://www.nature.com/doi/finder/10.1038/ncomms3572)  
590 [doi/finder/10.1038/ncomms3572](http://www.nature.com/doi/finder/10.1038/ncomms3572).
- 591 Fortuna, M. A., R. Ortega, and J. Bascompte. 2014. The Web of Life. [www.web-of-](http://www.web-of-life.es)  
592 [life.es](http://www.web-of-life.es) URL <http://arxiv.org/abs/1403.2575>[www.web-of-life.es](http://www.web-of-life.es).
- 593 Freeman, L. C. 1979. Centrality in networks. I. Conceptual clarificaion. *Social*  
594 *Networks* **1**:215–239.
- 595 Golley, F. 1993. A history of the ecosystem concept in ecology: More than the sum  
596 of the parts. Yale University Press, New Haven, CT.
- 597 Golubski, A. J., E. E. Westlund, J. Vandermeer, and M. Pascual. 2016. Ecological  
598 Networks over the Edge: Hypergraph Trait-Mediated Indirect Interaction (TMII)  
599 Structure. *Trends in Ecology & Evolution* URL [http://www.cell.com/article/](http://www.cell.com/article/S0169534716000513/fulltext)  
600 [S0169534716000513/fulltext](http://www.cell.com/article/S0169534716000513/fulltext).
- 601 Gotelli, N. J. 2000. Null model analysis of species co-occurrence patterns. *Ecology*  
602 **81**:2606–2621.
- 603 Gotelli, N. J., R. M. Dorazio, A. M. Ellison, and G. D. Grossman. 2010. Detecting  
604 temporal trends in species assemblages with bootstrapping procedures and hierar-  
605 chical models. *Philosophical transactions of the Royal Society of London. Series*  
606 *B, Biological sciences* **365**:3621–3631.
- 607 Gotelli, N. J., A. M. Ellison, and B. A. Ballif. 2012. Environmental proteomics, biodi-  
608 versity statistics and food-web structure. *Trends in ecology & evolution* **27**:436–42.  
609 URL [/pmcc/articles/PMC3392467/?report=abstract](http://pmcc/articles/PMC3392467/?report=abstract).

- 610 Gotelli, N. J., and G. R. Graves. 1996. Null models in ecology. *Ecol-*  
611 *ogy* **14**:368. URL [http://books.google.com/books?id=vjsBAAAACAAJ{\&  
612 }printsec=frontcover](http://books.google.com/books?id=vjsBAAAACAAJ{\& }printsec=frontcover).
- 613 Gotelli, N. J., and W. Ulrich, 2012. Statistical challenges in null model analysis.
- 614 Graham, M. H., and P. K. Dayton. 2002. ON THE EVOLUTION OF  
615 ECOLOGICAL IDEAS: PARADIGMS AND SCIENTIFIC PROGRESS. *Ecol-*  
616 *ogy* **83**:1481–1489. URL [http://doi.wiley.com/10.1890/0012-9658\(2002\)  
617 083\[1481:OTE0EI\]2.0.CO;2](http://doi.wiley.com/10.1890/0012-9658(2002)083[1481:OTE0EI]2.0.CO;2).
- 618 Gregr, E. J., and K. M. A. Chan. 2014. Leaps of Faith: How Implicit Assumptions  
619 Compromise the Utility of Ecosystem Models for Decision-making. *BioScience*  
620 **65**:43–54. URL [http://bioscience.oxfordjournals.org/content/65/1/43.  
621 full](http://bioscience.oxfordjournals.org/content/65/1/43.full).
- 622 Grilli, J., T. Rogers, and S. Allesina. 2016. Modularity and stability in ecological  
623 communities. *Nature Communications* **7**.
- 624 Guesnet, V., G. Lassalle, A. Chaalali, K. Kearney, B. Saint-Béat, B. Karimi,  
625 B. Grami, S. Tecchio, N. Niquil, and J. Lobry. 2015. Incorporating food-web  
626 parameter uncertainty into Ecopath-derived ecological network indicators. *Eco-*  
627 *logical Modelling* **313**:29–40. URL [http://www.sciencedirect.com/science/  
628 article/pii/S0304380015002495](http://www.sciencedirect.com/science/article/pii/S0304380015002495).
- 629 Guimarães, P. R., G. Machado, M. A. M. de Aguiar, P. Jordano, J. Bascompte,  
630 A. Pinheiro, and S. F. Dos Reis. 2007. Build-up mechanisms determining the  
631 topology of mutualistic networks. *Journal of theoretical biology* **249**:181–9. URL  
632 <http://www.ncbi.nlm.nih.gov/pubmed/17889903>.
- 633 Hampton, S. E., S. Anderson, S. C. Bagby, and C. Gries. 2014. The Tao of Open  
634 Science for Ecology. *PeerJ PrePrints* pages 1–30. URL [https://peerj.com/  
635 preprints/549/](https://peerj.com/preprints/549/).
- 636 Heymans, J. J., M. Coll, J. S. Link, S. Mackinson, J. Steenbeek, C. Walters, and  
637 V. Christensen. 2016. Best practice in Ecopath with Ecosim food-web models for  
638 ecosystem-based management. *Ecological Modelling* **331**:173–184.
- 639 Hines, D. E., and S. R. Borrett. 2014. A comparison of network, neighborhood, and  
640 node levels of analyses in two models of nitrogen cycling in the Cape Fear River  
641 Estuary. *Ecological Modelling* **293**:210–220. URL [http://www.sciencedirect.  
642 com/science/article/pii/S0304380013005607](http://www.sciencedirect.com/science/article/pii/S0304380013005607).

- 643 Hodges, K. E. 2008. Defining the problem: terminology and progress in ecology.  
644 *Frontiers in Ecology and the Environment* **6**:35–42. URL [http://doi.wiley.com/](http://doi.wiley.com/10.1890/060108)  
645 [10.1890/060108](http://doi.wiley.com/10.1890/060108).
- 646 Hollenberg, D. 2007. On the evolution and dynamics of biological networks. *Rivista*  
647 *di biologia* **100**:93–118. URL <http://www.ncbi.nlm.nih.gov/pubmed/17592821>.
- 648 Holstein, D. M., C. B. Paris, and P. J. Mumby. 2014. Consistency and inconsistency  
649 in multispecies population network dynamics of coral reef ecosystems. *Marine*  
650 *Ecology Progress Series* **499**:1–18.
- 651 Ings, T. C., J. M. Montoya, J. Bascompte, N. Blüthgen, L. Brown, C. F. Dormann,  
652 F. Edwards, D. Figuerola, U. Jacob, J. I. Jones, R. B. Lauridsen, M. E. Ledger,  
653 H. M. Lewis, J. M. Olesen, F. J. F. van Veen, P. H. Warren, and G. Woodward.  
654 2009. Ecological networks—beyond food webs. *The Journal of animal ecology*  
655 **78**:253–69. URL <http://www.ncbi.nlm.nih.gov/pubmed/19120606>.
- 656 Jacoby, D. M. P., and R. Freeman. 2016. Emerging network-based tools in movement  
657 ecology. *Trends in Ecology & Evolution* **31**:301–314.
- 658 Jones, C. G., J. H. Lawton, and M. Shachak. 1994. Organisms as Ecosystem Engi-  
659 neers. *Oikos* **69**:373–386.
- 660 Jordán, F., Z. Benedek, and J. Podani. 2007. Quantifying positional importance in  
661 food webs: A comparison of centrality indices. *Ecological Modelling* **205**:270–275.
- 662 Jørgensen, S. E., B. C. Patten, and M. Straškraba. 2000. Ecosystems emerging: 4.  
663 Growth. *Ecological Modelling* **126**:249–284.
- 664 Kauffman, S., C. Peterson, B. R. Samuelsson, C. Troein, and P. W. Ander-  
665 son. 2003. Random Boolean network models and the yeast transcriptional net-  
666 work. *Proceedings of the National Academy of Sciences* **100**:14796–14799. URL  
667 <http://www.pnas.org/cgi/doi/10.1073/pnas.2036429100>.
- 668 Kazanci, C., and Q. Ma, 2015. Chapter 3 System-wide measures in ecological net-  
669 work analysis. Pages 45–68 *in* Y.-S. Park, S. Lek, C. Baehr, and S. E. Jorgensen,  
670 editors. *Advanced Modelling Techniques Studying Global Changes in Environmen-*  
671 *tal Sciences*, volume 27. Elsevier.
- 672 Kéfi, S., E. L. Berlow, E. A. Wieters, S. A. Navarrete, O. L. Petchey, S. A. Wood,  
673 A. Boit, L. N. Joppa, K. D. Lafferty, R. J. Williams, N. D. Martinez, B. A.

- 674 Menge, C. A. Blanchette, A. C. Iles, and U. Brose. 2012. More than a meal{...}  
675 integrating non-feeding interactions into food webs. *Ecology Letters* **15**:291–300.  
676 URL <http://doi.wiley.com/10.1111/j.1461-0248.2011.01732.x>.
- 677 Kones, J. K., K. Soetaert, D. van Oevelen, and J. O. Owino. 2009. Are network  
678 indices robust indicators of food web functioning? A Monte Carlo approach. *Eco-*  
679 *logical Modelling* **220**:370–382. URL [http://www.sciencedirect.com/science/](http://www.sciencedirect.com/science/article/pii/S0304380008005024)  
680 [article/pii/S0304380008005024](http://www.sciencedirect.com/science/article/pii/S0304380008005024).
- 681 Krause, A. E., K. A. Frank, D. M. Mason, R. E. Ulanowicz, and W. W. Taylor.  
682 2003. Compartments revealed in food-web structure. *Nature* **426**:282–5. URL  
683 <http://dx.doi.org/10.1038/nature02115>.
- 684 Langfelder, P., and S. Horvath. 2008. WGCNA: an R package for weighted correlation  
685 network analysis. *BMC bioinformatics* **9**:559.
- 686 Lau, M. K., S. R. Borrett, D. E. Hines, and P. Singh, 2015. enaR: Tools for Ecological  
687 Network Analysis. URL <https://cran.r-project.org/web/packages/enaR/>.
- 688 Layton, A., B. Bras, and M. Weissburg. 2016. Ecological Principles and Metrics  
689 for Improving Material Cycling Structures in Manufacturing Networks. *Journal of*  
690 *Manufacturing Science and Engineering* **138**:101002.
- 691 Lédée, E. J. I., M. R. Heupel, A. J. Tobin, A. Mapleston, and C. A. Simpfendorfer.  
692 2016. Movement patterns of two carangid species in inshore habitats characterised  
693 using network analysis. *Marine Ecology Progress Series* **553**:219–232.
- 694 Legendre, P., L. Legendre, L. Legendre, and P. Legendre. 2012. *Numerical ecology*.  
695 Elsevier.
- 696 Lerner, B., and E. Boose, 2014. RDataTracker: Collecting Provenance in an In-  
697 teractive Scripting Environment. Pages 1–4 *in* 6th USENIX Workshop on the  
698 Theory and Practice of Provenance (TaPP 2014). USENIX Association, Cologne.  
699 URL [https://www.usenix.org/conference/tapp2014/agenda/presentation/](https://www.usenix.org/conference/tapp2014/agenda/presentation/lerner)  
700 [lerner](https://www.usenix.org/conference/tapp2014/agenda/presentation/lerner).
- 701 Lima, M. 2011. *Visual Complexity: Mapping Patterns of Information*. Princeton  
702 Architectural Press.
- 703 Lubchenco, J., A. M. Olson, L. B. Brubaker, S. R. Carpenter, M. M. Hol-  
704 land, S. P. Hubbell, S. A. Levin, J. A. MacMahon, P. A. Matson, J. M.

- 705 Melillo, H. A. Mooney, C. H. Peterson, and H. Ronald Pulliam. 1991. The  
706 Sustainable Biosphere Initiative: An Ecological Research Agenda: A Report  
707 from the Ecological Society of America. *Risser Source: Ecology* **72**:371–412.  
708 URL <http://www.jstor.org/stable/2937183><http://www.jstor.org/http://www.jstor.org/action/showPublisher?publisherCode=esa>.  
709
- 710 Ludovisi, A., and U. M. Scharler. 2017. Towards a sounder interpretation of entropy-  
711 based indicators in ecological network analysis. *Ecological Indicators* **72**:726–737.
- 712 MacArthur, R. 1955. Fluctuations of Animal Populations and a Measure of Com-  
713 munity Stability. *Ecology* **36**:533. URL [http://www.readcube.com/articles/](http://www.readcube.com/articles/10.2307/1929601)  
714 [10.2307/1929601](http://www.readcube.com/articles/10.2307/1929601).
- 715 Manly, B. F. J. 2007. Randomization, bootstrap and Monte Carlo methods in  
716 biology. Chapman and Hall. URL [http://www.loc.gov/catdir/toc/fy0702/](http://www.loc.gov/catdir/toc/fy0702/2006047407.html)  
717 [2006047407.html](http://www.loc.gov/catdir/toc/fy0702/2006047407.html).
- 718 Martinez, N. D., 1992. Constant Connectance in Community Food Webs.
- 719 Maslov, S., and K. Sneppen. 2002. Specificity and stability in topology of protein  
720 networks. *Science (New York, N.Y.)* **296**:910–3. URL [http://www.ncbi.nlm.](http://www.ncbi.nlm.nih.gov/pubmed/11988575)  
721 [nih.gov/pubmed/11988575](http://www.ncbi.nlm.nih.gov/pubmed/11988575).
- 722 May, R. M. 1972. Will a Large Complex System be Stable? *Nature* **238**:413–414.  
723 URL <http://dx.doi.org/10.1038/238413a0>.
- 724 May, R. M. 2001. Stability and Complexity in Model Ecosystems. Princeton Uni-  
725 versity Press. URL [http://books.google.com/books?hl=en&lr=&id=](http://books.google.com/books?hl=en&lr=&id=BDA5-ipCLt4C&pgis=1)  
726 [BDA5-ipCLt4C&pgis=1](http://books.google.com/books?hl=en&lr=&id=BDA5-ipCLt4C&pgis=1).
- 727 May, R. M. 2006. Network structure and the biology of populations. *Trends in ecol-*  
728 *ogy {&} evolution* **21**:394–399. URL [http://www.ncbi.nlm.nih.gov/pubmed/](http://www.ncbi.nlm.nih.gov/pubmed/16815438)  
729 [16815438](http://www.ncbi.nlm.nih.gov/pubmed/16815438).
- 730 McNutt, M., K. Lehnert, B. Hanson, B. A. Nosek, A. M. Ellison, and J. L. King.  
731 2016. Liberating field science samples and data. *Science* **351**:1024–1026. URL  
732 <http://science.sciencemag.org/content/351/6277/1024.abstract>.
- 733 Milo, R., S. Shen-Orr, S. Itzkovitz, N. Kashtan, D. Chklovskii, U. Alon, S. H. Stro-  
734 gatz, D. Watts, S. H. Strogatz, A.-L. Barabási, R. Albert, M. Newman, H. Jeong,  
735 B. Tombor, R. Albert, Z. N. Oltvai, A. L. Barabasi, R. F. Cancho, C. Janssen,

- 736 R. V. Sole, R. F. Cancho, R. V. Sole, L. Amaral, A. Scala, M. Barthelemy,  
737 H. Stanley, B. Huberman, L. Adamic, S. Shen-Orr, R. Milo, S. Mangan, U. Alon,  
738 N. Guelzim, S. Bottani, P. Bourguine, F. Kepes, M. Newman, S. H. Strogatz,  
739 D. Watts, S. Maslov, K. Sneppen, D. Thieffry, A. M. Huerta, E. Perez-Rueda,  
740 J. Collado-Vides, M. C. Costanzo, R. Williams, N. Martinez, S. Pimm, J. Law-  
741 ton, J. Cohen, J. White, E. Southgate, J. Thomson, S. Brenner, D. Callaway,  
742 J. Hopcroft, J. Kleinberg, M. Newman, and S. H. Strogatz. 2002. Network motifs:  
743 simple building blocks of complex networks. *Science (New York, N.Y.)* **298**:824–7.  
744 URL <http://www.ncbi.nlm.nih.gov/pubmed/12399590>.
- 745 Newman, M. 2010. *Networks an Introduction*. Oxford University  
746 Press. URL [http://www.oxfordscholarship.com/view/10.1093/acprof:oso/](http://www.oxfordscholarship.com/view/10.1093/acprof:oso/9780199206650.001.0001/acprof-9780199206650)  
747 [9780199206650.001.0001/acprof-9780199206650](http://www.oxfordscholarship.com/view/10.1093/acprof:oso/9780199206650.001.0001/acprof-9780199206650).
- 748 Newman, M. E. J., 2003. *The Structure and Function of Complex Networks*.
- 749 Newman, M. E. J. 2006. Modularity and community structure in networks. *Pro-*  
750 *ceedings of the National Academy of Sciences of the United States of America*  
751 **103**:8577–82. URL <http://www.pnas.org/content/103/23/8577.short>.
- 752 Newman, M. E. J., A. Clauset, C. Aicher, A. Z. Jacobs, A. Clauset, S. Fortu-  
753 nato, P. Holme, M. Huss, H. Jeong, R. Guimerà, L. A. N. Amaral, D. Hric,  
754 R. K. Darst, S. Fortunato, M. Barthélemy, A. Z. Jacobs, A. Clauset, K. Zuev,  
755 G. B. M. Boguñá, D. Krioukov, B. H. Good, Y.-A. d. Montjoye, A. Clauset,  
756 C. Bothorel, J. D. Cruz, M. Magnani, B. Micenková, N. Binkiewicz, J. T. Vogel-  
757 stein, K. Rohe, E. Galbrun, A. Gionis, N. Tatti, T. J. Hansen, M. W. Mahoney,  
758 Y. Zhang, E. Levina, J. Zhu, P. Expert, T. S. Evans, V. D. Blondel, R. Lambiotte,  
759 L. Peel, P. Zhang, C. Moore, L. Zdeborová, X. Maa, L. Gaoa, X. Yongb, L. Fua,  
760 Z.-Y. Zhang, P. W. Holland, K. B. Laskey, S. Leinhardt, B. Karrer, M. E. J. New-  
761 man, A. Decelle, F. Krzakala, C. Moore, L. Zdeborová, E. Mossel, J. Neeman,  
762 A. Sly, J. Moody, L. Danon, J. Duch, A. Diaz-Guilera, A. Arenas, A. F. Mc-  
763 Daid, D. Greene, N. Hurley, U. Brose, G. Woodward, A. L. Traud, P. J. Mucha,  
764 M. A. Porter, P. C. Bull, D. B. Larremore, A. Clauset, C. Z. Buckee, D. B.  
765 Larremore, A. Clauset, A. Z. Jacobs, G. M. Warimwe, P. C. Bull, A. Clauset,  
766 C. Moore, M. E. J. Newman, R. Milo, S. P. Borgatti, M. G. Everett, B. Ball,  
767 M. E. J. Newman, P. D. Hoff, A. E. Raftery, and M. S. Handcock. 2016. Struc-  
768 ture and inference in annotated networks. *Nature Communications* **7**:11863. URL  
769 <http://www.nature.com/doi/10.1038/ncomms11863>.
- 770 Newman, M. E. J., S. H. Strogatz, and D. J. Watts. 2001. Random graphs with

- 771 arbitrary degree distributions and their applications. *Physical Review E* **64**:026118.  
772 URL <http://arxiv.org/abs/cond-mat/0007235/>.
- 773 Noble, W. S. 2009. A quick guide to organizing computational biology projects.  
774 *PLoS computational biology* **5**:e1000424. URL [http://dx.plos.org/10.1371/  
775 journal.pcbi.1000424](http://dx.plos.org/10.1371/journal.pcbi.1000424).
- 776 Paine, R. T. 1966. Food Web Complexity and Species Diversity. *The American*  
777 *Naturalist* **100**:65.
- 778 Parker, T. H., S. Nakagawa, and J. Gurevitch. 2016. Promoting transparency in  
779 evolutionary biology and ecology. *Ecology Letters* **19**:726–728. URL [http://  
780 doi.wiley.com/10.1111/ele.12610](http://doi.wiley.com/10.1111/ele.12610).
- 781 Patten, B. C., and G. T. Auble. 1981. System theory of the ecological niche. *American*  
782 *Naturalist* **117**:893–922. URL <GotoISI>://BIOABS:BACD198172072401.
- 783 Patten, B. C., and C. Bernard. 1978. Systems approach to the concept of environ-  
784 ment. *Ohio Journal of Science* **78**:206–222. URL [https://kb.osu.edu/dspace/  
785 handle/1811/22549](https://kb.osu.edu/dspace/handle/1811/22549).
- 786 Patten, B. C., and M. Witkamp. 1967. Systems analysis of <sup>134</sup>cesium kinetics in  
787 terrestrial microcosms. *Ecology* **48**:813–824.
- 788 Petanidou, T., A. S. Kallimanis, J. Tzanopoulos, S. P. Sgardelis, and J. D. Pantis.  
789 2008. Long-term observation of a pollination network: Fluctuation in species and  
790 interactions, relative invariance of network structure and implications for estimates  
791 of specialization. *Ecology Letters* **11**:564–575.
- 792 Pimm, S. L. 1982. *Food webs*. Chapman and Hall, London; New York.
- 793 Poisot, T., B. Baiser, J. A. Dunne, S. Kéfi, F. Massol, N. Mouquet, T. N. Ro-  
794 manuk, D. B. Stouffer, S. A. Wood, and D. Gravel. 2015. mangal mak-  
795 ing ecological network analysis simple. *Ecography* pages n/a–n/a. URL [http://  
796 //onlinelibrary.wiley.com/doi/10.1111/ecog.00976/abstract](http://onlinelibrary.wiley.com/doi/10.1111/ecog.00976/abstract).
- 797 Poisot, T., D. Gravel, S. Leroux, S. A. Wood, M.-J. Fortin, B. Baiser, A. R. Cirtwill,  
798 M. B. Araújo, and D. B. Stouffer. 2016a. Synthetic datasets and community  
799 tools for the rapid testing of ecological hypotheses. *Ecography* **39**:402–408. URL  
800 <http://doi.wiley.com/10.1111/ecog.01941>.



- 801 Poisot, T., D. B. Stouffer, and S. Kéfi. 2016*b*. Describe, understand and predict:  
802 why do we need networks in ecology? *Functional Ecology* **30**:1878–1882. URL  
803 <http://doi.wiley.com/10.1111/1365-2435.12799>.
- 804 Post, D. M., M. L. Pace, and N. G. Hairston. 2000. Ecosystem size determines  
805 food-chain length in lakes. *Nature* **405**:1047–1049.
- 806 Proulx, S. R., D. E. L. Promislow, and P. C. Phillips. 2005. Network thinking in  
807 ecology and evolution. *Trends in ecology & evolution* **20**:345–53. URL <http://www.ncbi.nlm.nih.gov/pubmed/16701391>.  
808
- 809 QUINTESENCE Consortium, M. E., S. Carpenter, e. al., G. Daily, e. al.,  
810 C. Raudsepp-Hearne, e. al., I. P. o. B. Services, Ecosystem, J. Silvertown,  
811 M. Schröter, e. al., S. Naeem, e. al., N. Biggs, e. al., A. Mashaghi, e. al.,  
812 T. Ideker, R. Sharan, J. Gardy, e. al., T. Valente, D. Acemoglu, e. al., M. Jack-  
813 son, M. Janssen, e. al., G. Woodward, e. al., C. Mulder, J. Elser, R. Thomp-  
814 son, e. al., J. Montoya, e. al., O. Petchey, e. al., J. Reiss, e. al., A. Barabasi,  
815 R. Albert, F. Harary, R. Haines-Young, S. Macfadyen, e. al., K. Rathwell,  
816 G. Peterson, R. Costanza, I. Kubiszewski, C. Mulder, e. al., H. Tallis, e. al.,  
817 A. Tavoni, S. Levin, A. Ma, R. Mondragón, M. Pascual, J. Dunne, F. Jordán,  
818 e. al., H. Ernstson, e. al., U. Narloch, e. al., M. Hagen, e. al., R. Stewart,  
819 e. al., A. Shmida, M. Wilson, M. Palmer, e. al., G. Mace, e. al., R. d. Groot,  
820 e. al., H. Zimmermann, R. Albert, e. al., M. Pockock, e. al., K. Chan, e. al.,  
821 L. Dicks, e. al., G. McInerney, e. al., M. Pockock, e. al., A. Vespignani, D. Bo-  
822 han, e. al., P. Anderson, J. Cohen, e. al., J. Montoya, e. al., S. Pimm, C. Holling,  
823 A. Trichard, e. al., D. Bohan, and e. al. 2016. Networking Our Way to Better  
824 Ecosystem Service Provision. *Trends in ecology & evolution* **31**:105–15. URL  
825 <http://www.ncbi.nlm.nih.gov/pubmed/26777789>.
- 826 Samuelson, P. A. 1948. *Economics: An Introductory Analysis*. McGraw–Hill Book  
827 Co., New York,.
- 828 Shen, H.-W., and A.-L. Barabasi. 2014. Collective credit allocation in science.  
829 *Proceedings of the National Academy of Sciences* **111**:12325–12330. URL <http://www.pnas.org/content/111/34/12325.abstract>.  
830
- 831 Sih, A., S. F. Hanser, and K. a. McHugh. 2009. Social network theory: New insights  
832 and issues for behavioral ecologists. *Behavioral Ecology and Sociobiology* **63**:975–  
833 988.

- 834 Simberloff, D., and B. V. Holle. 1999. Positive interactions of nonindigenous species:  
835 invasional meltdown? *Biological Invasions* pages 21–32.
- 836 Solé, R. V., and J. M. Montoya. 2001. Complexity and fragility in ecological networks.  
837 *Proceedings of the Royal Society B* **268**:2039–2045.
- 838 Stouffer, D. B., and J. Bascompte. 2010. Understanding food-web persistence from  
839 local to global scales. *Ecology Letters* **13**:154–161. URL [http://doi.wiley.com/  
840 10.1111/j.1461-0248.2009.01407.x](http://doi.wiley.com/10.1111/j.1461-0248.2009.01407.x).
- 841 Strogatz, S. H. 2001. Exploring complex networks. *Nature* **410**:268–76. URL  
842 <http://dx.doi.org/10.1038/35065725>.
- 843 Stumpf, M. P. H., W. P. Kelly, T. Thorne, and C. Wiuf. 2007. Evolution at the system  
844 level: the natural history of protein interaction networks. *Trends in ecology &  
845 evolution* **22**:366–373. URL <http://www.ncbi.nlm.nih.gov/pubmed/17475365>.
- 846 Sutherland, W. J., R. P. Freckleton, H. C. J. Godfray, S. R. Beissinger, T. Ben-  
847 ton, D. D. Cameron, Y. Carmel, D. A. Coomes, T. Coulson, M. C. Emmer-  
848 son, R. S. Hails, G. C. Hays, D. J. Hodgson, M. J. Hutchings, D. Johnson,  
849 J. P. G. Jones, M. J. Keeling, H. Kokko, W. E. Kunin, X. Lambin, O. T. Lewis,  
850 Y. Malhi, N. Mieszkowska, E. J. Milner-Gulland, K. Norris, A. B. Phillimore,  
851 D. W. Purves, J. M. Reid, D. C. Reuman, K. Thompson, J. M. J. Travis,  
852 L. A. Turnbull, D. A. Wardle, and T. Wiegand. 2013. Identification of 100  
853 fundamental ecological questions. *Journal of Ecology* **101**:58–67. URL [http:  
854 //doi.wiley.com/10.1111/1365-2745.12025](http://doi.wiley.com/10.1111/1365-2745.12025).
- 855 Tansley, A. G. 1935. The Use and Abuse of Vegetational Concepts and Terms.  
856 *Ecology* **16**:284–307. URL [http://links.jstor.org/sici?sici=0012-9658\(1935\)  
857 }28193507\(1\)2916\(1\)3A3\(1\)3C284\(1\)3ATUAAOV\(1\)3E2.0.CO\(1\)3B2-P](http://links.jstor.org/sici?sici=0012-9658(1935)28193507(1)2916(1)3A3(1)3C284(1)3ATUAAOV(1)3E2.0.CO(1)3B2-P).
- 858 Ulanowicz, R. E., 1986. Introduction. Pages 1–8 *in* *Growth and Develop-*  
859 *ment*. Springer New York, New York, NY. URL [http://link.springer.  
860 com/10.1007/978-1-4612-4916-0\(1\)1http://link.springer.com/10.1007/  
861 978-1-4612-4916-0\(1\)1](http://link.springer.com/10.1007/978-1-4612-4916-0(1)1http://link.springer.com/10.1007/978-1-4612-4916-0(1)1).
- 862 Ulanowicz, R. E., R. D. Holt, and M. Barfield. 2014. Limits on ecosystem trophic  
863 complexity: insights from ecological network analysis. *Ecology letters* **17**:127–36.  
864 URL <http://www.ncbi.nlm.nih.gov/pubmed/24382355>.
- 865 Ulrich, W., and N. J. Gotelli. 2007. Null model analysis of species nestedness  
866 patterns. *Ecology* **88**:1824–1831.

- 867 Ulrich, W., and N. J. Gotelli. 2010. Null model analysis of species associations  
868 using abundance data. *Ecology* **91**:3384–97. URL [http://www.ncbi.nlm.nih.  
869 gov/pubmed/21141199](http://www.ncbi.nlm.nih.gov/pubmed/21141199).
- 870 Urban, D., and T. Keitt. 2001. Landscape connectivity: A graph-theoretic perspec-  
871 tive. *Ecology* **82**:1205–1218.
- 872 Valente, T. W., K. Coronges, C. Lakon, and E. Costenbader. 2008. How Correlated  
873 Are Network Centrality Measures? *Connections (Toronto, Ont.)* **28**:16–26.
- 874 Vermaat, J. E., J. a. Dunne, and A. J. Gilbert. 2009. Major dimensions in food-web  
875 structure properties. *Ecology* **90**:278–282. URL [http://www.ncbi.nlm.nih.gov/  
876 pubmed/19294932](http://www.ncbi.nlm.nih.gov/pubmed/19294932).
- 877 Visser, M. D., S. M. McMahon, C. Merow, P. M. Dixon, S. Record, E. Jonge-  
878 jans, W. Michener, M. Jones, S. Petrovskii, N. Petrovskaya, A. Ellison, B. Den-  
879 nis, G. Hager, G. Wellein, P. Zuidema, E. Jongejans, P. Chien, H. During,  
880 F. Schieving, B. V. Putten, M. Visser, H. Muller-Landau, P. Jansen, L. Comita,  
881 H. Muller-Landau, S. Aguilar, S. Hubbell, C. Merow, N. LaFleur, J. Silander,  
882 A. Wilson, M. Rubega, M. Visser, E. Jongejans, M. V. Breugel, P. Zuidema,  
883 Y.-Y. Chen, A. Kassim, J. Chambers, B. Kernighan, P. Plauger, G. Amdahl,  
884 A. Porter, R. Selby, R. Bryant, D. OHallaron, M. Schmidberger, M. Morgan,  
885 D. Eddelbuettel, H. Yu, L. Tierney, U. Mansmann, A. Grama, G. Karypis,  
886 V. Kumar, A. Gupta, P. LEcuyer, D. Eddelbuettel, R. François, D. Eddelbuet-  
887 tel, C. Sanderson, H. Robbins, S. Monro, A. Mantoglou, J. Wilson, A. Finley,  
888 Z. Merali, A. Guisan, A. Lehmann, S. Ferrier, M. Austin, J. Overton, B. Brook,  
889 J. OGrady, A. Chapman, M. Burgman, H. Akçakaya, R. Frankham, F. Isbell,  
890 V. Calcagno, A. Hector, J. Connolly, W. Harpole, P. Reich, E. V. Moran, J. Clark,  
891 G. Bohrer, G. Katul, R. Walko, and R. Avissar. 2015. Speeding Up Eco-  
892 logical and Evolutionary Computations in R; Essentials of High Performance  
893 Computing for Biologists. *PLOS Computational Biology* **11**:e1004140. URL  
894 <http://dx.plos.org/10.1371/journal.pcbi.1004140>.
- 895 Wang, S., and B. Chen. 2016. Energy-water nexus of urban agglomeration based on  
896 multiregional input-output tables and ecological network analysis: A case study  
897 of the Beijing-Tianjin-Hebei region. *Applied Energy* **178**:773–783.
- 898 Wasserman, S., and K. Faust. 1994. *Advances in Social Network Analysis: Research*  
899 *in the Social and Behavioral Sciences*. SAGE Publications. URL [http://books.  
900 google.com/books?hl=en&lr=&id=C6juDKDmvCcC&pgis=1](http://books.google.com/books?hl=en&lr=&id=C6juDKDmvCcC&pgis=1).

- 901 Williams, R. J., E. L. Berlow, J. a. Dunne, A.-L. Barabási, and N. D. Mar-  
902 tinez. 2002. Two degrees of separation in complex food webs. Proceed-  
903 ings of the National Academy of Sciences of the United States of America  
904 **99**:12913–12916. URL [http://www.pubmedcentral.nih.gov/articlerender.  
905 fcgi?artid=130559&tool=pmcentrez&rendertype=abstract](http://www.pubmedcentral.nih.gov/articlerender.fcgi?artid=130559&tool=pmcentrez&rendertype=abstract).
- 906 Williams, R. J., and N. D. Martinez. 2000. Simple rules yield complex food  
907 webs. *Nature* **404**:180–183. URL [http://www.nature.com/doi/10.1038/  
908 35004572](http://www.nature.com/doi/10.1038/35004572).
- 909 Woodward, G. U. Y., J. P. Benstead, O. S. Beveridge, J. Blanchard, T. Brey, L. E.  
910 E. E. Brown, W. F. Cross, N. Friberg, C. Ings, U. T. E. Jacob, S. Jennings, M. E.  
911 Ledger, A. M. Milner, J. M. Montoya, E. O. Gorman, J. M. Olesen, O. L. Petchey,  
912 E. Pichler, D. C. Reuman, M. S. A. Thompson, F. J. F. V. a. N. Veen, G. Yvon-  
913 Durocher, T. C. Ings, U. T. E. Jacob, S. Jennings, M. E. Ledger, A. M. Milner,  
914 J. M. Montoya, E. O 'gorman, J. M. Olesen, O. L. Petchey, D. E. Pichler, D. C.  
915 Reuman, M. S. A. Thompson, F. J. F. Van Veen, and G. Yvon-Durocher. 2010.  
916 Ecological Networks in a Changing Climate. *Advances In Ecological Research* **42**.  
917 Ecological Networks. **42**:72–120.
- 918 Xia, L., B. D. Fath, U. M. Scharler, and Y. Zhang. 2016. Spatial variation in the  
919 ecological relationships among the components of {Beijing}'s carbon metabolic  
920 system. *Science of the Total Environment* **544**:103–113.
- 921 Yang, J., and B. Chen. 2016. Energy–water nexus of wind power generation systems.  
922 *Applied Energy* **169**:1–13.
- 923 Yodzis, P., and S. Innes. 1992. Body Size and Consumer-Resource Dynamics. *The*  
924 *American Naturalist* **139**:1151–1175. URL [http://www.journals.uchicago.  
925 edu/doi/10.1086/285380](http://www.journals.uchicago.edu/doi/10.1086/285380).
- 926 Zhao, L., H. Zhang, E. J. O'Gorman, W. Tian, A. Ma, J. C. Moore, S. R. Borrett,  
927 and G. Woodward. 2016. Weighting and indirect effects identify keystone species  
928 in food webs. *Ecology Letters* **19**:1032–1040.
- 929 Zinkgraf, M., L. Liu, A. Groover, and V. Filkov. 2017. Identifying gene coex-  
930 pression networks underlying the dynamic regulation of wood-forming tissues in  
931 *Populus* under diverse environmental conditions. *New Phytologist* URL  
932 <http://doi.wiley.com/10.1111/nph.14492>.

## 933 **Acknowledgments**

934 This work was supported by the US National Science Foundation under grant SSI-  
935 1450277 End-to-End Provenance

## 936 **Author contributions statement**

937 All authors contributed to the conception, writing and review of the manuscript.

## 938 Boxes

939 *Box 1. Benchmarking Ecological Models* The most basic test is to feed the algorithm  
940 a set of "random" matrices to make sure that the frequency of statistically significant  
941 results is no greater than 5%. Otherwise, the algorithm is vulnerable to a Type I  
942 statistical error (incorrectly rejecting a true null hypothesis). However, specifying a  
943 matrix produced by random sampling errors is not so easy. Obviously, if the null  
944 model algorithm itself is used to generate the random matrices, then no more than  
945 5% of them should be statistically significant (unless there were programming errors).  
946 For binary matrices, two log-normal distributions can be used to generate realistic  
947 heterogeneity in row and column totals, while still maintaining additive effects for cell  
948 occurrence probabilities (Ulrich and Gotelli, 2010). "Structured" matrices are needed  
949 to test for Type II errors (incorrectly accepting a false null hypothesis), and these  
950 require a careful consideration of exactly what sort of pattern or mechanism the test  
951 is designed to reveal. One approach is to begin with a perfectly structured matrix,  
952 such as one derived from a mechanistic model for generating network structure,  
953 contaminate it with increasing amounts of stochastic noise, and test for the statistical  
954 pattern at each step (Gotelli, 2000). A plot of the  $p$  value versus the added noise  
955 should reveal an increasing curve, and will indicate the signal/noise ratio below  
956 which the test cannot distinguish the pattern from randomness. Alternatively, one  
957 can begin with a purely random matrix but embed in it a non-random substructure,  
958 such as a matrix clique or a node with extreme centrality. The size, density, and  
959 other attributes of this matrix can be manipulated to see whether the test can still  
960 detect the presence of the embedded structure (Gotelli et al., 2010). Because all  
961 null model tests (and all frequentist statistics) are affected by sample size and data  
962 structure, these benchmark tests can be tailored to the attributes of the empirical  
963 data structures for better focus and improved inference.

964 Even simple randomization algorithms may require further filters to ensure that  
965 random matrices retain a number of desirable network properties. For example,  
966 Dunne et al. (2002) created random food web matrices with constant species rich-  
967 ness and connectance, but they discarded webs with unconnected nodes and subwebs  
968 because these topologies were not observed in the empirical webs. A "stub recon-  
969 struction" algorithm builds a topology that is constrained to the observed number  
970 of edges per node (Newman et al., 2001). Each node is assigned the correct number  
971 of edges, and then nodes are successively and randomly paired to create a growing  
972 network. However, this algorithm will also generate multiple edges between the same  
973 two nodes, which must be discarded or otherwise accounted for. Maslov and Sneppen  
974 (2002) use a "local re-wiring algorithm" that preserves the number of connections

975 for every node by randomly swapping edges between different pairs of nodes. This  
976 algorithm is closely analogous to the swap algorithm used in species co-occurrence  
977 analyses that preserves the row and column totals of the original matrix (Connor  
978 and Simberloff, 1979). The more constraints that are added to the algorithm, the  
979 less likely it is that simple sampling processes can account for patterns in the data;  
980 however, some constraints, such as connectivity or matrix density, may inadvertently  
981 "smuggle in" the very processes they are designed to detect. This can lead to the  
982 so-called "Narcissus" effect of Colwell and Winkler (1984). Finding the correct bal-  
983 ance between realistic constraints and statistical power is not easy (Gotelli et al.,  
984 2012), and there are many potential algorithms that could reasonably be used, even  
985 for simple binary matrices (Gotelli, 2000).

986 **Tables**

| Sub-discipline | Level | Metric                 | Concept                                                                                                                                                  | Reference                                                                                      |
|----------------|-------|------------------------|----------------------------------------------------------------------------------------------------------------------------------------------------------|------------------------------------------------------------------------------------------------|
| General        | W     | Density                | The proportion of possible edges that are actually associated with nodes; called Connectance in Food Web ecology.                                        |                                                                                                |
| General        | N     | Centrality             | Multiple ways to characterize the relative importance of nodes.                                                                                          | Wasserman and Faust (1994)                                                                     |
| General        | N     | Degree                 | Number of edges connected to a given node, which is a type of local centrality.                                                                          |                                                                                                |
| General        | N     | Eigenvector Centrality | Global centrality metric based on number of paths that travel through a node                                                                             | Bonacich (1987)                                                                                |
| General        | W     | Centralization         | Shape of the frequency distribution of edges among nodes.                                                                                                | Barabási and Albert (1999); Dunne et al. (2002)                                                |
| General        | W     | Graph diameter         | The concentration (versus evenness) of centrality among the nodes.                                                                                       | Freeman (1979)                                                                                 |
| General        | W     | Modularity             | The longest path between any two nodes in a graph.                                                                                                       | Barabási et al. (2000); Urban and Keitt (2001)                                                 |
| General        | G     | Motifs                 | Degree to which edges are distributed within rather than between distinct sets of nodes.                                                                 | Newman (2010)                                                                                  |
| General        | N     | Link density           | Small sets of nodes with similar distributions of edges.                                                                                                 | Milo et al. (2002)                                                                             |
| Community      | N     | Temperature            | Average number of edges per node.                                                                                                                        | Martinez (1992)                                                                                |
| Community      | W     | Co-occurrence          | Measures the nestedness of a bipartite network.                                                                                                          | Ulrich and Gotelli (2007)                                                                      |
| Community      | N     | Indicator Species      | Degree of overlapping spatial or temporal distributions of species relative to a null model.                                                             | Gotelli (2000)                                                                                 |
| Community      | W     | Nestedness             | The degree to which the abundance of a taxonomic group responds to an environmental gradient.                                                            |                                                                                                |
| Community      | W     | Evenness               | The degree to which interactions can be arranged into subsets of the larger community                                                                    |                                                                                                |
| Community      | W     | Diversity              | Deviation of the distribution of observed abundances relative to an even distribution among taxonomic groups in a community                              |                                                                                                |
| Community      | W     | Richness               | Distribution of abundances among taxonomic groups in an observed community                                                                               |                                                                                                |
| Community      | W     | Stability              | The number of taxonomic groups in a community                                                                                                            |                                                                                                |
| Food-Web       | N     | Removal Importance     | The change in the abundances of taxonomic groups across a set of observations                                                                            |                                                                                                |
| General        | N     | Connectance            | The degree to which removal of a compartment or species produces subsequent removals in the ecosystem.                                                   | Borrvall et al. (2000); Dunne et al. (2002); Eklöf and Ebenman (2006); Solé and Montoya (2001) |
| Food-Web       | G     | Food-chain length      | Proportion of realized out of possible edges                                                                                                             | Pimm (1982); Vermaat et al. (2009)                                                             |
| Ecosystem      | W     | Finn cycling index     | The number of feeding relationships among a set of compartments in a food-web.                                                                           | Post et al. (2000); Ulanowicz et al. (2014)                                                    |
| Ecosystem      | G     | Environ                | Degree to which matter or energy passes through the same set of compartments.                                                                            | Finn (1980)                                                                                    |
| Ecosystem      | N     | Throughflow            | The sub-network of the probability of movement of energy or matter among compartments generated by a single unit of input (output) into a selected node. | Patten and Auble (1981); Patten and Bernard (1978)                                             |
| Ecosystem      | N     | Throughflow Centrality | Amount of energy or matter passing into or out of a node                                                                                                 | Finn (1976)                                                                                    |
| General        | G     | Chain Length           | The proportion of energy or matter that passes through a given compartment in an ecosystem.                                                              | Borrett (2013)                                                                                 |
| Food-Web       | G     | Average Path Length    | Number of edges between two nodes in a group                                                                                                             |                                                                                                |
| Ecosystem      | W     | Pathway Proliferation  | The average number of times a unit of matter or energy travels from one compartment to another before exiting the ecosystem                              | Finn (1976)                                                                                    |
| Ecosystem      | W     | Ascendency             | Rate of increase in the number of edges between nodes with increasing path length                                                                        | Borrett et al. (2007)                                                                          |
| Food-Web       | N     | Trophic Level          | Measures the average similarity in matter or energy flows among compartments in an ecosystem.                                                            | Ulanowicz (1986)                                                                               |
|                |       |                        | Ordinal classification of a compartment or taxonomic group based on the relative position in the ecosystem.                                              | Allesina and Pascual (2009); Fath (2004); Williams et al. (2002)                               |

Table 1: Ecological network metric summary and classification. Level indicates the hierarchy of the metric (W = Whole network, G = Group or sub-network, N = Node). The Sub-disciplines include 'General' network theory, 'Community' ecology, 'Food-web' and 'Ecosystem' ecology.



987 **Figures**

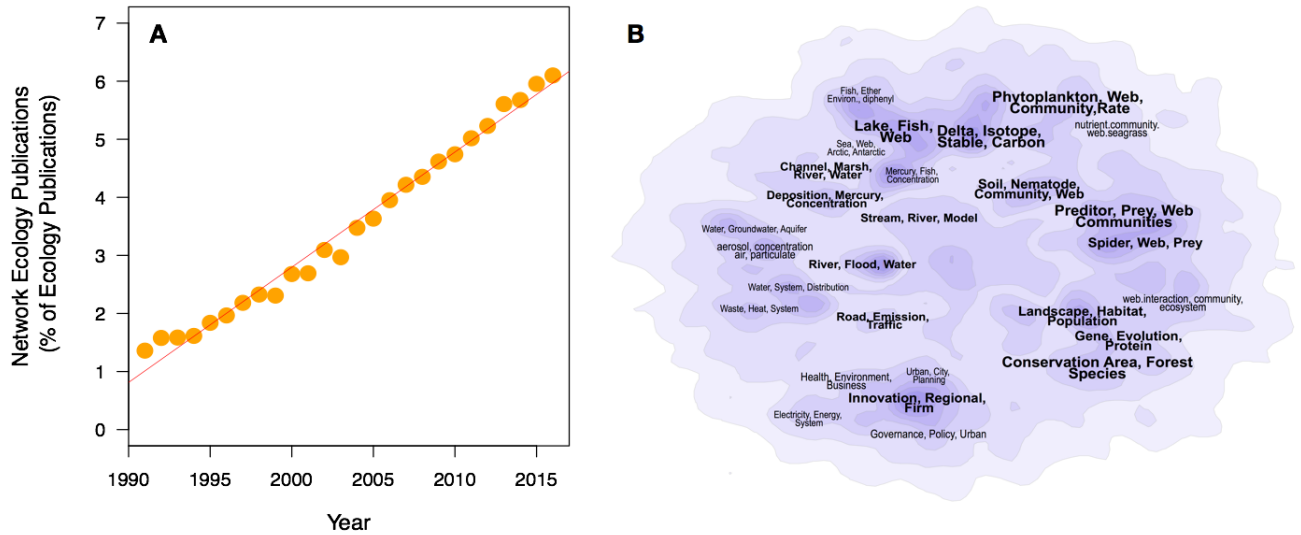

Figure 1: Although systems thinking has been a part of ecology since at least the work of Darwin, network ecology has grown rapidly since the turn of the last century but has been developing in isolated sub-fields. (A) Plot showing the increase in “network ecology” keywords in the literature from 1991 to current (updated search based on Borrett et al., 2014). (B) Contour plot of common topics in network ecology with peaks indicating clusters of related topics. The regions are labeled with the most common terms found in the clusters. From Borrett et al. (2014), reproduced with permission.

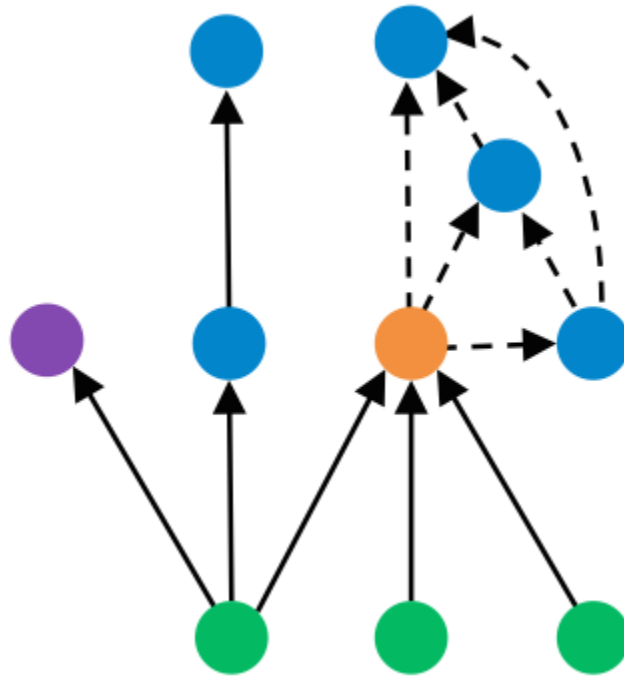

Figure 2: Hypothetical unweighted, directed network showing examples of the four classes of network metrics. *Node Level*: the purple node exhibits low centrality while the orange node exhibits high centrality. *Group or Sub-Network Level*: the blue nodes connected with dashed edges shows a module. *Global or Whole Network Level*: using the edges of all nodes we can measure the connectance of the entire network ( $c = \text{edges}/\text{nodes}^2 = 0.12$ ).
